# Supplementary material
Source: bioRxiv or medRxiv preprint supplement (https://medrxiv.org/highwire/filestream/82843/field_highwire_adjunct_files/0/2020.05.20.20106526-1.pdf)
Supplement: Supplementary file [file 2020.05.20.20106526-1.pdf]

## Supplement

### Estimating prevalence of subjective cognitive decline in and across international cohort studies of ageing:

#### A COSMIC study

#### INDEX

|                                                                                                                                                                                                                                                                                       |    |
|---------------------------------------------------------------------------------------------------------------------------------------------------------------------------------------------------------------------------------------------------------------------------------------|----|
| 1. Tables.....                                                                                                                                                                                                                                                                        | 2  |
| Table e-1. Key references for contributing studies .....                                                                                                                                                                                                                              | 2  |
| Table e-2. Dementia diagnosis at baseline .....                                                                                                                                                                                                                                       | 3  |
| Table e-3. Selected items forming a bridging item to indicate a self-experienced decline in cognitive capacity across studies. ....                                                                                                                                                   | 4  |
| Table e-4. Availability of additional items for a self-experienced decline in cognitive capacity.....                                                                                                                                                                                 | 5  |
| Table e-5. Instruments used for assessing instrumental activities of daily living (IADL) .....                                                                                                                                                                                        | 7  |
| Table e-6. Harmonization protocol for major depressive symptomatology .....                                                                                                                                                                                                           | 8  |
| Table e-7. Harmonization protocol for major anxiety symptomatology .....                                                                                                                                                                                                              | 9  |
| Table e-8. Study-based prevalence estimates for subjective cognitive decline (SCD; right column) and cumulative frequency estimates for the stepwise application of SCD operationalization criteria according to quantitative harmonization based on studies with multiple items..... | 10 |
| 2. References .....                                                                                                                                                                                                                                                                   | 11 |

## 1. Tables

| <b>Table e-1. Key references for contributing studies.</b>          |                                                                       |
|---------------------------------------------------------------------|-----------------------------------------------------------------------|
| <b>Study</b>                                                        | <b>Key reference</b>                                                  |
| Atma Jaya Cognitive & Aging Research (ActiveAging)                  | Turana et al. 2014 <sup>1</sup>                                       |
| Cognitive Function & Ageing Studies (CFAS)                          | Brayne, McCracken & Matthews 2006 <sup>2</sup>                        |
| Einstein Aging Study USA (EAS)                                      | Katz et al. 2012 <sup>3</sup>                                         |
| Epidemiology of dementia in Central Africa (EPIDEMCA)               | Guerchet et al. 2014 <sup>4</sup>                                     |
| Etude Santé Psychologique et Traitement (ESPRIT)                    | Ritchie, Carrière, Ritchie, Berr, Artero & Ancelin 2010 <sup>5</sup>  |
| Invecchiamento Cerebrale in Abbiategrasso (Invece.Ab)               | Guaita et al. 2013 <sup>6</sup>                                       |
| Korean Longitudinal Study on Cognitive Aging and Dementia (KLOSCAD) | Han et al. 2018 <sup>7</sup>                                          |
| Leipzig Longitudinal Study of the Aged (LEILA75+)                   | Riedel-Heller, Schork, Matschinger & Angermeyer 2000 <sup>8</sup>     |
| Long-term Research Grant Scheme - Towards Useful Aging (LRGS-TUA)   | Shahar et al. 2015 <sup>9</sup>                                       |
| Maastricht Aging Study (MAAS)                                       | Jolles, van Boxtel, Ponds, Metsmakers & Houx 1998 <sup>10</sup>       |
| Monongahela Valley Independent Elders Survey (MoVIES)               | Ganguli, Mendelsohn, Lytle & Dodge 1998 <sup>11</sup>                 |
| Personality and Total Health Through Life Project (PATH)            | Anstey et al. 2012 <sup>12</sup>                                      |
| Sasaguri Genkimon Study (SGS)                                       | Narazaki, Nofuji, Honda, Matsuo, Yonemoto, Kumagai 2013 <sup>13</sup> |
| Singapore Longitudinal Ageing Studies II (SLASII)                   | Feng et al. 2010 <sup>14</sup>                                        |
| Sydney Memory and Ageing Study (SydneyMAS)                          | Sachdev et al. 2010 <sup>15</sup>                                     |
| Zaragoza Dementia Depression Project (ZARADEMP)                     | Lobo et al. 2005 <sup>16</sup>                                        |

| <b>Table e-2. Dementia diagnosis at baseline.</b> |                                                                                                                                                   |
|---------------------------------------------------|---------------------------------------------------------------------------------------------------------------------------------------------------|
| <b>Study</b>                                      | <b>Dementia criteria</b>                                                                                                                          |
| ActiveAgeing                                      | DSM-IV <sup>17</sup>                                                                                                                              |
| CFAS                                              | AGECAT <sup>18</sup> ; organicity level of O3                                                                                                     |
| EAS                                               | DSM-IV                                                                                                                                            |
| EPIDEMCA                                          | DSM-IV                                                                                                                                            |
| ESPRIT                                            | Standardized interview by a neurologist incorporating cognitive testing, with diagnoses validated by an independent panel of expert neurologists. |
| Invece.Ab                                         | DSM-IV                                                                                                                                            |
| KLOSCAD                                           | DSM-IV                                                                                                                                            |
| LEILA75+                                          | DSM-IV                                                                                                                                            |
| LRGS-TUA                                          | N/A                                                                                                                                               |
| MAAS                                              | N/A                                                                                                                                               |
| MoVIES                                            | CDR <sup>19</sup> $\geq$ 1                                                                                                                        |
| PATH                                              | DSM-IV                                                                                                                                            |
| SGS                                               | Self-reported medical history                                                                                                                     |
| SLAS II                                           | DSM-IV                                                                                                                                            |
| SydneyMAS                                         | DSM-IV                                                                                                                                            |
| ZARADEMP                                          | DSM-IV                                                                                                                                            |

Abbreviations: AGECAT: Automated Geriatric Examination for Computer Assisted Taxonomy), CDR = Clinical Dementia Rating; DSM - Diagnostic and Statistical Manual of Mental Disorders; N/A = Not applicable/dementia excluded per study design

**Table e-3. Selected items forming a bridging item to indicate a self-experienced decline in cognitive capacity across studies.**

| Study        | Selected item*                                                                                                                         | Coding**                                                                                    | Instrument            | Item properties                                     |
|--------------|----------------------------------------------------------------------------------------------------------------------------------------|---------------------------------------------------------------------------------------------|-----------------------|-----------------------------------------------------|
| ActiveAgeing | Do you feel you have more problems with your memory than most?                                                                         | 1 = yes, 2 = no                                                                             | GDS <sup>20</sup>     | Memory; relation to others                          |
| CFAS         | Have you ever had any difficulty with your memory? Is that a problem for you?                                                          | 0 = no, 1 = yes: 0 = no, 1 = yes, moderate, 2 = yes, severe                                 | NSQ                   | Memory; relation to time: ever                      |
| EAS          | Compared with one year ago, do you have trouble remembering things more often, less often or about the same?                           | 1 = more often, 2 = less often, 3 = about the same                                          | NSQ                   | Memory; relation to time: 1 year                    |
| EPIDEMCA     | GMS - Subjective difficulty, i.e., implies memory impairment                                                                           | 0 = no, 1 = yes                                                                             | NSQ                   | Memory                                              |
| ESPRIT       | Are you usually experiencing any of the following symptoms: Forgetful in everyday activities?                                          | 0 = no, 1 = yes                                                                             | NSQ                   | Memory                                              |
| Invece.Ab    | Do you think to have memory problems?                                                                                                  | 0 = no, 1 = yes                                                                             | NSQ                   | Memory                                              |
| KLOSCAD      | Do you think that you have a memory problem?                                                                                           | 0 = no, 1 = yes                                                                             | SMCQ <sup>21,22</sup> | Memory                                              |
| LEILA75+     | Do have problems with your memory?                                                                                                     | 0 = no, 1 = yes                                                                             | NSQ                   | Memory                                              |
| LRGS-TUA     | Are you having problems with your memory currently?                                                                                    | 0 = no, 1 = yes                                                                             | GDS                   | Memory                                              |
| MAAS         | Have cognitive failures increased during past 5 years?                                                                                 | 0 = not at all, 1 = very little, 2 = somewhat, 3 = much, 4 = very much                      | NSQ                   | Cognition, relation to time: 5 years                |
| MoVIES       | In general, how good do you feel your memory is for a person your age?                                                                 | 1 = excellent, 2 = good, 3 = fair, 4 = poor                                                 | NSQ                   | Memory, relation to age                             |
| PATH         | Remembering things that have happened recently                                                                                         | 1 = much improved, 2 = a bit improved, 3 = not much change, 4 = a bit worse, 5 = much worse | IQCODE <sup>22</sup>  | Memory: relation to time: recent; self-administered |
| SGS          | Are you sometimes unable to recall date of today/a day?                                                                                | 1 = yes, 2 = no                                                                             | NSQ                   | Memory                                              |
| SLAS II      | Overall, how would you rate your memory or other mental abilities as compared to earlier period of your life (more than one year ago)? | 1 = much better, 2 = a bit better, 3 = a bit worse, 5 = much worse                          | NSQ                   | Memory, cognition: relation to time: >1 year        |
| SydneyMAS    | Have you noticed difficulties with your memory?                                                                                        | 1 = no, 2 = yes                                                                             | NSQ                   | Memory                                              |
| ZARADEMP     | Have you had any difficulty with your memory?                                                                                          | 0 = no, 1 = yes                                                                             | NSQ                   | Memory                                              |

Abbreviations: GDS = Geriatric Depression Scale; NSQ = No specified instrument/self-formulated questions; IQCODE = Informant Questionnaire for Cognitive Decline in the Elderly; SMCQ = Subjective Memory Complaints Questionnaire

\*measurement approach: population-based; respondent category: self-report; administration mode: interview

\*\*for harmonization, categories were collapsed/dichotomized and/or recoded, if necessary, into 0 = no (absence of a self-experienced decline in cognitive capacity) and 1 = yes (presence of a self-experienced decline in cognitive capacity). Any indication of a self-experienced decline in cognitive capacity was categorized as “1”.





**Table e-5. Instruments used for assessing instrumental activities of daily living (IADL).**

| <b>Study</b> | <b>IADL Instruments</b>                                                                                                                                                                                     |
|--------------|-------------------------------------------------------------------------------------------------------------------------------------------------------------------------------------------------------------|
| ActiveAgeing | Lawton & Brody IADL Scale <sup>23</sup>                                                                                                                                                                     |
| CFAS         | Modified Townshend Disability Scale <sup>24</sup>                                                                                                                                                           |
| EAS          | Lawton & Brody IADL Scale                                                                                                                                                                                   |
| EPIDEMCA     | Adapted Lawton & Brody IADL Scale                                                                                                                                                                           |
| ESPRIT       | Lawton & Brody IADL Scale                                                                                                                                                                                   |
| Invece.Ab    | Lawton & Brody IADL Scale                                                                                                                                                                                   |
| KLOSCAD      | Disability Assessment of Dementia (DAD) <sup>25</sup>                                                                                                                                                       |
| LEILA75+     | SIDAM-A structured interview for the diagnosis of dementia of the Alzheimer type, multi-infarct dementia and dementias of other aetiology according to ICD-10, DSM-III-R and DSM-IV (SIDAM-B) <sup>26</sup> |
| LRGS-TUA     | Lawton & Brody IADL Scale                                                                                                                                                                                   |
| MAAS         | Lawton & Brody IADL Scale                                                                                                                                                                                   |
| MoVIES       | Older Americans' Resources and Services Multidimensional Functional Assessment Questionnaire Center Instrument (OMFAQ) <sup>27</sup>                                                                        |
| PATH         | Lawton & Brody IADL Scale                                                                                                                                                                                   |
| SGS          | Five-item scale for instrumental self-maintenance of the Tokyo Metropolitan Institute of Gerontology Index of Competence (TMIG) <sup>28</sup>                                                               |
| SLAS II      | Lawton & Brody IADL Scale                                                                                                                                                                                   |
| SydneyMAS    | Bayer ADL Scale <sup>29</sup>                                                                                                                                                                               |
| ZARADEMP     | Lawton & Brody IADL Scale                                                                                                                                                                                   |

**Table e-6. Harmonization protocol for major depressive symptomatology.**

| <b>Study</b> | <b>Current*</b>                                                                                                                                                                       | <b>History*</b>                                                  |
|--------------|---------------------------------------------------------------------------------------------------------------------------------------------------------------------------------------|------------------------------------------------------------------|
| ActiveAgeing | GDS $\geq$ 11                                                                                                                                                                         | N/A                                                              |
| CFAS         | GMS-AGECAT rating of subcase or clinical case                                                                                                                                         | Diagnosis of depression or manic depression                      |
| EAS          | GDS $\geq$ 11                                                                                                                                                                         | N/A                                                              |
| EPIDEMCA     | GMS-AGECAT rating of subcase or clinical case                                                                                                                                         | N/A                                                              |
| ESPRIT       | 1. Current major depressive episode (MINI neuropsychiatric exam <sup>30</sup> )<br>2. CES-D <sup>31</sup> score $\geq$ 24                                                             | History of major depressive episode (MINI neuropsychiatric exam) |
| Invece.Ab    | 1. Use of anti-depressants<br>2. GDS score $\geq$ 11<br>3. Criteria-based diagnosis by physician/ psychologist (including medication, GDS score and CES-D items)                      | N/A                                                              |
| KLOSCAD      | 1. Diagnosis with status as “following-up” or “under treatment”<br>2. NPI <sup>32</sup> part D<br>3. Clinical diagnosis of major depressive disorder<br>4. Korean GDS score $\geq$ 16 | 1. History of depression                                         |
| LEILA75+     | 1. DSM-IV criteria based on structured clinical interview<br>2. CES-D score $\geq$ 24                                                                                                 | Self-reported history                                            |
| LRGS-TUA     | GDS $\geq$ 11                                                                                                                                                                         | N/A                                                              |
| MAAS         | SCL-90 <sup>33</sup> Depression subscale                                                                                                                                              | N/A                                                              |
| MoVIES       | mCES-D $\geq$ 5                                                                                                                                                                       | N/A                                                              |
| PATH         | 1. GADS <sup>34</sup> $\geq$ 6<br>2. Use of anti-depressants                                                                                                                          | Self-reported history and doctor seen                            |
| SGS          | K6 <sup>35</sup> $\geq$ 5 (combined with anxiety)                                                                                                                                     | N/A                                                              |
| SLAS II      | 1. GDS $\geq$ 11<br>2. Major depressive disorder by SCID                                                                                                                              | History of depression by antidepressant and report               |
| SydneyMAS    | 1. GDS $\geq$ 11<br>2. Use of medication/treatment with GP/psychiatrist/psychologist/in hospital                                                                                      | Depression ever diagnosed                                        |
| ZARADEMP     | GMS-AGECAT rating of subcase or clinical case                                                                                                                                         | N/A                                                              |

Abbreviations: CES-D = Centre for Epidemiological Studies - Depression Scale; CIRS = Cumulative Illness Rating Scale; DSM-IV = Diagnostic and Statistical Manual of Mental Disorders (4th edition); GADS = Goldberg Anxiety and Depression Scale depression score; GDS = Geriatric Depression Scale; GMS-AGECAT = Geriatric Mental State - Automated Geriatric Examination for Computer Assisted Taxonomy; GP = general practitioner; ICD-10 = International Classification of Diseases (10th revision); mCES-D = modified Centre for Epidemiological Studies - Depression Scale; K6 = Kessler Psychological Distress Scale; MINI = Mini International Neuropsychiatric Interview; N/A = not available; NPI = Neuropsychiatric Inventory; SCID = Structured Clinical Interview for DSM-IV; SCL-90 = Symptom Checklist

\*for studies with more than one measure, meeting criteria for either was sufficient.



**Table e-7. Harmonization protocol for major anxiety symptomatology.**

| Study        | Criteria                                                                                                       |
|--------------|----------------------------------------------------------------------------------------------------------------|
| ActiveAgeing | N/A                                                                                                            |
| CFAS         | GMS-AGECAT confidence/severity rating $\geq 3$                                                                 |
| EAS          | BAI <sup>36</sup> $\geq 19$                                                                                    |
| EPIDEMCA     | GMS-AGECAT probable Anxiety                                                                                    |
| ESPRIT       | MINI neuropsychiatric exam diagnosis of current anxiety or generalized anxiety disorder                        |
| Invece.Ab    | Use of anxiolytics                                                                                             |
| KLOSCAD      | 1. Diagnosis with status “following-up” or “under treatment”<br>2. NPI part E [scale score=anxiety x severity] |
| LEILA75+     | N/A                                                                                                            |
| LRGS-TUA     | N/A                                                                                                            |
| MAAS         | SCL-90 Anxiety Subscale                                                                                        |
| MoVIES       | N/A                                                                                                            |
| PATH         | 1. GADS, anxiety score $\geq 5$<br>2. Anxiety medications taken                                                |
| SGS          | K6, anxiety score $\geq 5$                                                                                     |
| SLAS II      | self-reported history of anxiety, or presence of anxiety symptoms based on NPI                                 |
| SydneyMAS    | GADS, anxiety score $\geq 5$                                                                                   |
| ZARADEMP     | GMS-AGECAT diagnosis                                                                                           |

Abbreviation: BAI = Beck Anxiety Scale; GADS = Goldberg Anxiety and Depression Scale depression score; GMS-AGECAT = Geriatric Mental State-Automated Geriatric Examination for Computer Assisted Taxonomy; K6 = Kessler Psychological Distress Scale; MINI = Mini International Neuropsychiatric Interview; N/A = not available; NPI = Neuropsychiatric Inventory; SCL-90 = Symptom Checklist

**Table e-8. Study-based age- and gender-standardized prevalence estimates for subjective cognitive decline (SCD; right column) and cumulative frequency estimates for the stepwise application of SCD operationalization criteria according to quantitative harmonization based on studies with additional items for a self-experienced decline in cognitive capacity.**

| Study         | SCD operationalization criteria                                                                                       |                                            |                                      |                                      |
|---------------|-----------------------------------------------------------------------------------------------------------------------|--------------------------------------------|--------------------------------------|--------------------------------------|
|               | Criterion 1<br>Endorsement of a self-experienced decline in cognitive capacity without objective cognitive impairment | + Criterion 2<br>Intact functional ability | + Criterion 3<br>No major depression | + Criterion 4<br>No anxiety disorder |
|               | % (95% CI)                                                                                                            |                                            |                                      |                                      |
| CFAS          | 23.53 (22.13-24.93)                                                                                                   | 21.62 (20.22-23.01)                        | 17.83 (16.64-19.02)                  | 9.40 (8.44-10.36)                    |
| EAS           | 50.33 (44.88-55.78)                                                                                                   | 45.84 (40.61-51.06)                        | 39.05 (34.67-44.33)                  | 25.64 (18.76-32.52)                  |
| EPIDEMCA      | 57.71 (55.58-59.85)                                                                                                   | 54.35 (52.13-56.58)                        | 31.38 (29.21-33.55)                  | 28.43 (26.42-30.44)                  |
| ESPRIT        | 31.97 (30.01-33.93)                                                                                                   | 29.49 (27.58-31.41)                        | 24.55 (22.74-26.36)                  | 18.90 (17.34-20.47)                  |
| KLOSCAD       | 55.59 (54.16-57.02)                                                                                                   | 50.61 (49.15-52.08)                        | 36.00 (34.60-37.41)                  | 35.84 (34.52-37.16)                  |
| MoVIES        | 30.01 (27.61-32.54)                                                                                                   | 27.83 (25.41-30.24)                        | 24.39 (22.06-26.71)                  | N/A                                  |
| PATH          | 11.93 (10.71-13.14)                                                                                                   | 10.98 (9.80-12.16)                         | 9.82 (8.69-10.95)                    | 7.84 (6.78-8.90)                     |
| SLAS II       | 25.61 (23.48-27.74)                                                                                                   | 23.00 (20.94-25.06)                        | 22.31 (20.28-24.35)                  | 21.16 (19.32-23.01)                  |
| SydneyMAS     | 46.48 (44.36-48.60)                                                                                                   | 43.35 (41.09-45.61)                        | 36.42 (34.08-38.77)                  | 29.20 (26.94-31.47)                  |
| <b>Total*</b> | <b>36.52 (35.97-37.08)</b>                                                                                            | <b>33.73 (33.18-34.28)</b>                 | <b>27.02 (26.50-27.54)</b>           | <b>26.07 (25.43-26.72)</b>           |

Abbreviations: 95% CI = 95% confidence interval; N/A = not available; \*unstandardized

## 2. e-References

1. Turana Y, Ranakusuma TAS, Purba JS, Amir N, Ahmad SA, Machfoed MH, et al. Enhancing Diagnostic Accuracy of aMCI in the Elderly: Combination of Olfactory Test, Pupillary Response Test, BDNF Plasma Level, and APOE Genotype. *Int J Alzheimers Dis* 2014;2014:9.
2. Brayne C, McCracken C, Matthews FE. Cohort profile: the Medical Research Council Cognitive Function and Ageing Study (CFAS). *Int J Epidemiol* 2006;35(5):1140-1145.
3. Katz MJ, Lipton RB, Hall CB, Zimmerman ME, Sanders AE, Verghese J, et al. Age-specific and sex-specific prevalence and incidence of mild cognitive impairment, dementia, and Alzheimer dementia in blacks and whites: a report from the Einstein Aging Study. *Alzheimer Dis Assoc Disord* 2012;26(4):335-343.
4. Guerchet M, Mbelesso P, Ndamba-Bandzouzi B, Pilleron S, Desormais I, Lacroix P, et al. Epidemiology of dementia in Central Africa (EPIDEMCA): protocol for a multicentre population-based study in rural and urban areas of the Central African Republic and the Republic of Congo. *Springerplus* 2014;3(1):338.
5. Ritchie K, Carriere I, Ritchie CW, Berr C, Artero S, Ancelin M-L. Designing prevention programmes to reduce incidence of dementia: prospective cohort study of modifiable risk factors. *BMJ* 2010;341:c3885.
6. Guaita A, Colombo M, Vaccaro R, Fossi S, Vitali SF, Forloni G, et al. Brain aging and dementia during the transition from late adulthood to old age: design and methodology of the "Invece.Ab" population-based study. *BMC Geriatr* 2013;13:98.
7. Han JW, Kim TH, Kwak KP, Kim K, Kim BJ, Kim SG, et al. Overview of the Korean Longitudinal Study on Cognitive Aging and Dementia. *Psychiatry Investig*. 2018;15(8):767-774.
8. Riedel-Heller SG, Schork A, Matschinger H, Angermeyer MC. Recruitment Procedures and Their Impact on the Prevalence of Dementia. *Neuroepidemiology* 2000;19(3):130-140.
9. Shahar S, Omar A, Vanoh D, Hamid TA, Mukari SZ, Din NC, et al. Approaches in methodology for population-based longitudinal study on neuroprotective model for healthy longevity (TUA) among Malaysian Older Adults. *Aging Clin Exp Res* 2016;28(6):1089-1104.
10. Jolles J, van Boxtel MP, Ponds RW, Metsemakers JF, Houx PJ. The Maastricht aging study (MAAS). The longitudinal perspective of cognitive aging. *Tijdschr Gerontol Geriatr* 1998;29(3):120-129.
11. Ganguli M, Mendelsohn A, Lytle M, Dodge H. A follow-up comparison of study participants and refusers within a rural elderly population. *J Gerontol A Biol Sci Med Sci* 1998;53(6):M465-70.
12. Anstey KJ, Christensen H, Butterworth P, Eastel S, Mackinnon A, Jacomb T, et al. Cohort profile: the PATH through life project. *Int J Epidemiol* 2012;41(4):951-960.
13. Narazaki K, Nofuji Y, Honda T, Matsuo E, Yonemoto K, Kumagai S. Normative data for the montreal cognitive assessment in a Japanese community-dwelling older population. *Neuroepidemiology* 2013;40(1):23-29.
14. Feng L, Chong MS, Lim WS, Lee TS, Collinson SL, Yap P, Ng TP. Metabolic syndrome and amnesic mild cognitive impairment: Singapore Longitudinal Ageing Study-2 findings. *J Alzheimers Dis* 2013;34(3):649-657.
15. Sachdev PS, Brodaty H, Reppermund S, Kochan NA, Trollor JN, Draper B, et al. The Sydney Memory and Ageing Study (MAS): methodology and baseline medical and neuropsychiatric characteristics of an elderly epidemiological non-demented cohort of Australians aged 70-90 years. *Int Psychogeriatr* 2010;22(8):1248-1264.
16. Lobo A, Saz P, Marcos G, D a JL, De-la-C amara C, Ventura T, et al. The ZARADEMP Project on the incidence, prevalence and risk factors of dementia (and depression) in the elderly community: II. Methods and first results. *Eur J Psychiatry* 2005;19:40-54.
17. *Diagnostic and statistical manual of mental disorders: DSM-IV*: Fourth edition. Washington, DC: American Psychiatric Association;1994.
18. Dewey ME, Copeland JRM. Computerized psychiatric diagnosis in the elderly: AGE-CAT. *J Microcomput Appl* 1986;9(2):135-140.
19. Morris JC. Clinical dementia rating: a reliable and valid diagnostic and staging measure for dementia of the Alzheimer type. *Int Psychogeriatr* 1997;9 Suppl1:173-176; discussion 177-178.
20. Sheikh JI, Yesavage JA. Geriatric Depression Scale (GDS): Recent evidence and development of a shorter version. *Clin Gerontol* 1986;5(1-2):165-173.
21. Youn JC, Kim KW, Lee DY, Jhoo JH, Lee SB, Park JH, et al. Development of the Subjective Memory Complaints Questionnaire. *Dement Geriatr Cogn Disord* 2009;27(4):310-317.
22. Jorm AF, Jacomb PA. The Informant Questionnaire on Cognitive Decline in the Elderly (IQCODE): socio-demographic correlates, reliability, validity and some norms. *Psychol Med* 1989;19(4):1015-1022.
23. Lawton MP, Brody EM. Assessment of Older People: Self-Maintaining and Instrumental Activities of Daily Living1. *Gerontologist* 1969;9(3\_Part\_1):179-186.

24. Townsend P. *Poverty in the United Kingdom: A survey of household resources and standards of living*. Repr. Harmondsworth: Penguin;1983.
25. Gelinas I, Gauthier L, McIntyre M, Gauthier S. Development of a functional measure for persons with Alzheimer's disease: the disability assessment for dementia. *Am J Occup Ther* 1999;53(5):471-481.
26. Zaudig M, Mittelhammer J, Hiller W, et al. SIDAM—A structured interview for the diagnosis of dementia of the Alzheimer type, multi-infarct dementia and dementias of other aetiology according to ICD-10 and DSM-III-R. *Psychol Med* 1991;21(1):225-236.
27. Fillenbaum GG, Smyer MA. The development, validity, and reliability of the OARS multidimensional functional assessment questionnaire. *J Gerontol* 1981;36(4):428-434.
28. Koyano W, Shibata H, Nakazato K, Haga H, Suyama Y. Measurement of competence: reliability and validity of the TMIG Index of Competence. *Arch Gerontol Geriatr*. 1991;13(2):103-116.
29. Hindmarch I, Leffeld H, de Jongh P, Erzigkeit H. The Bayer activities of daily living scale (B-ADL). *Dement Geriatr Cogn Disord* 1998;9(Suppl. 2):20-26.
30. Sheehan DV, Lecrubier Y, Sheehan KH, Amorim P, Janavs J, Weiller E, et al. The Mini-International Neuropsychiatric Interview (M.I.N.I.): the development and validation of a structured diagnostic psychiatric interview for DSM-IV and ICD-10. *J Clin Psychiatry* 1998;59 Suppl 20:22-33;quiz 34-57.
31. Radloff LS. The CES-D scale: A self-report depression scale for research in the general population. *Appl Psychol Meas* 1977;1(3):385-401.
32. Cummings JL, Mega M, Gray K, Rosenberg-Thompson S, Carusi DA, Gornbein J. The Neuropsychiatric Inventory: comprehensive assessment of psychopathology in dementia. *Neurology* 1994;44(12):2308-2314.
33. Derogatis LR. *SCL 90 R Administration, Scoring and Procedures Manual II for the Revised Version and Other Instruments of the Psychopathology Rating Scale Series: Clinical Psychometric Research*;1986.
34. Goldberg DP, Bridges K, Duncan-Jones P, Grayson D. Dimensions of neuroses seen in primary-care settings. *Psychol Med* 1987;17(2):461-470.
35. Kessler RC, Andrews G, Colpe LJ, Hirpi E, Mroczek DK, Normand SL, et al. Short screening scales to monitor population prevalences and trends in non-specific psychological distress. *Psychol Med* 2002;32(6):959-976.
36. Beck AT, Epstein N, Brown G, Steer RA. An inventory for measuring clinical anxiety: psychometric properties. *JCCP* 1988;56(6):893.
